# Supplementary material for: Quantification of synthetic errors during chemical synthesis of DNA and its suppression by non-canonical nucleosides
Source: PubMed Central journal article supplement (PMC9287346; doi:10.1038/s41598-022-16222-2), 2022-07-15
Supplement: 41598_2022_16222_MOESM1_ESM.pdf [file 41598_2022_16222_MOESM1_ESM.pdf]

**SUPPLEMENTAL INFORMATION**

**Quantification of synthetic errors  
during chemical synthesis of DNA  
and its suppression by non-canonical nucleosides**

Yoshiaki Masaki,<sup>1,2\*</sup> Yukiko Onishi,<sup>1</sup> and Kohji Seio<sup>1</sup>

<sup>1</sup>Department of Life Science and Technology, Tokyo Institute of Technology, 4259-J2-16 Nagatsuta, Midori, Yokohama, Kanagawa, 226-8501, JAPAN.

<sup>2</sup>JST, PRESTO, 4-1-8 Honcho, Kawaguchi, Saitama, 332-0012, JAPAN.

\*Correspondence: ymasaki@bio.titech.ac.jp

## Table of contents

|                                                                                          |    |
|------------------------------------------------------------------------------------------|----|
| Supplemental experimental information: Catalog ID of reagents.....                       | 3  |
| Figure S1. Reproducibility of synthetic errors under different synthetic conditions..... | 5  |
| Figure S2. Boxplots of synthetic errors under different synthetic conditions.....        | 8  |
| Table S1. Observed mean error frequencies under each synthetic condition.....            | 11 |
| Table S2. Summary of median error rates under each synthetic condition. ....             | 11 |
| Figure S3. Synthetic condition dependency of error rates.....                            | 12 |
| Figure S4. Optimized structures of guanine base derivatives. ....                        | 13 |
| Table S3. Calculated energy of intermediates at M06-2X/6-31+G(d,p). ....                 | 14 |
| Table S4. Frequencies for optimized structures.....                                      | 14 |
| Table S5. Cartesian coordinations of calculated nucleobases .....                        | 16 |

## Supplemental experimental information: Catalog ID of reagents

### Phosphoramidites

|                                                          |                                                                                                                              |
|----------------------------------------------------------|------------------------------------------------------------------------------------------------------------------------------|
| dT-CE phosphoramidite (Glen research)                    |                                                                                                                              |
| 10-1030-2C                                               | 5'-Dimethoxytrityl-2'-deoxyThymidine,3'-[(2-cyanoethyl)-(N,N-diisopropyl)]-phosphoramidite                                   |
| dG-CE phosphoramidite (Glen research)                    |                                                                                                                              |
| 10-1020-2C                                               | 5'-Dimethoxytrityl-N-isobutyryl-2'-deoxyGuanosine,3'-[(2-cyanoethyl)-(N,N-diisopropyl)]-phosphoramidite                      |
| Ac-dC-CE phosphoramidite (Glen research)                 |                                                                                                                              |
| 10-1015-2C                                               | 5'-Dimethoxytrityl-N-acetyl-2'-deoxyCytidine,3'-[(2-cyanoethyl)-(N,N-diisopropyl)]-phosphoramidite                           |
| dA-CE phosphoramidite (Glen research)                    |                                                                                                                              |
| 10-1000-2C                                               | 5'-Dimethoxytrityl-N-benzoyl-2'-deoxyAdenosine,3'-[(2-cyanoethyl)-(N,N-diisopropyl)]-phosphoramidite                         |
| 7-Deaza deoxy Guanosine CED phosphoramidite (Chem Genes) |                                                                                                                              |
| ANP-4857                                                 | 5'-Dimethoxytrityl-N-isobutyryl-7-deaza-2'-deoxyGuanosine,3'-[(2-cyanoethyl)-(N,N-diisopropyl)]-phosphoramidite              |
| 7-Deaza-8-aza-dG-CE Phosphoramidite (Glen research)      |                                                                                                                              |
| 10-1073-90E                                              | 5'-Dimethoxytrityl-N-dimethylformamide-8-aza-7-deaza-2'-deoxyGuanosine,3'-[(2-cyanoethyl)-(N,N-diisopropyl)]-phosphoramidite |

### Activators

|                                       |                                                                |
|---------------------------------------|----------------------------------------------------------------|
| 1 <i>H</i> -tetrazole (Glen research) |                                                                |
| 30-3102-52                            | Sublimed 1 <i>H</i> -Tetrazole in Anhydrous Acetonitrile       |
| DCI (Glen research)                   |                                                                |
| 30-3152-52                            | 0.25M DCI in Anhydrous Acetonitrile                            |
| BTT (Glen research)                   |                                                                |
| 30-3172-52                            | 0.25M 5-Benzylthio-1 <i>H</i> -Tetrazole (BTT) in Acetonitrile |

### Capping reagents

|                                                           |                                                           |
|-----------------------------------------------------------|-----------------------------------------------------------|
| Ac <sub>2</sub> O, Py, Melm/THF (Glen research)           |                                                           |
| 40-4012-52                                                | 10% Acetic Anhydride in Tetrahydrofuran                   |
| 40-4122-52                                                | 10% 1-Methylimidazole, 10 % Pyridine in Tetrahydrofuran   |
| Ac <sub>2</sub> O, 2,6-lutidine, Melm/THF (Glen research) |                                                           |
| 40-4010-52                                                | 10% Acetic Anhydride, 10% 2,6-Lutidine in Tetrahydrofuran |
| 40-4220-52                                                | 16% 1-Methylimidazole in Tetrahydrofuran                  |
| Pac <sub>2</sub> O, Py, Melm/THF (Glen research)          |                                                           |
| 40-4212-52                                                | 5% Phenoxyacetic anhydride/Tetrahydrofuran (5:95, v/v/v)  |
| 40-4122-52                                                | 10% 1-Methylimidazole in Tetrahydrofuran/Pyridine         |

### Oxidation reagents

|                                       |                                                  |
|---------------------------------------|--------------------------------------------------|
| 0.02 M I <sub>2</sub> (Glen research) |                                                  |
| 40-4132-52                            | 0.02M Iodine in Tetrahydrofuran/ Water/ Pyridine |

0.5 M CSO (Glen research)

40-4632-52E      0.5M CSO in Anhydrous Acetonitrile

**Deblocking reagents**

3% TCA (Fujifilm-Wako)

042-28921      3w/v% Trichloroacetic Acid, Dichloromethane Solution

DCA (Glen research)

40-4040-57      3% Dichloroacetic acid in Dichloromethane

**Solid support**

Glen UnySupport™ 1000

20-5241-41      Glen UnySupport™ 1000

1H-tetrazole, 10%Ac<sub>2</sub>O -10%Melm/10%Py/THF, 0.02M I<sub>2</sub>, 3%TCA

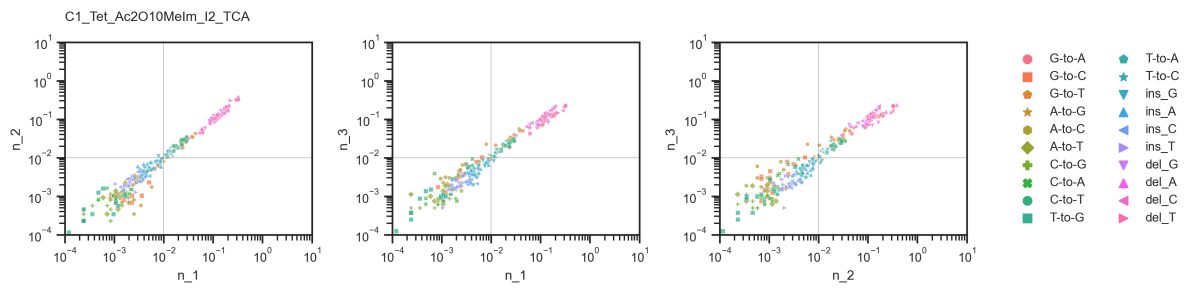

DCI, 10%Ac<sub>2</sub>O -10%Melm/10%Py/THF, 0.02M I<sub>2</sub>, 3%TCA

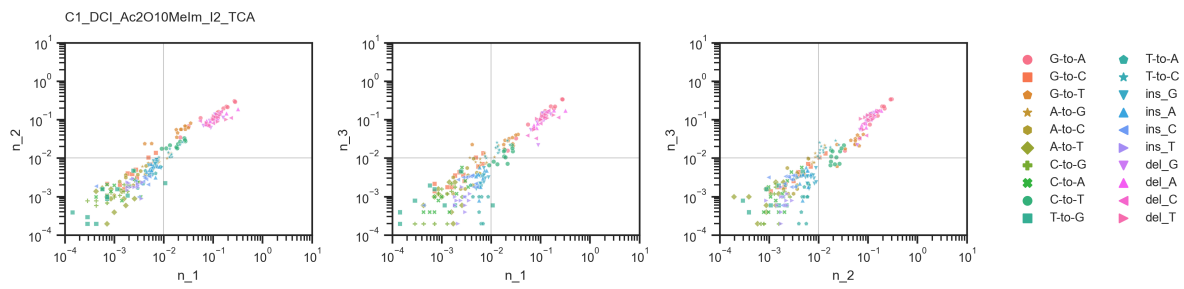

BTT, 10%Ac<sub>2</sub>O -10%Melm/10%Py/THF, 0.02M I<sub>2</sub>, 3%TCA

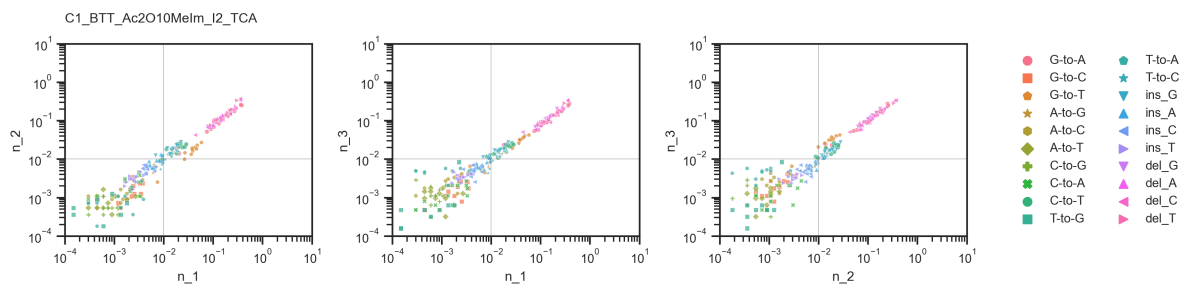

BTT, 10%Ac<sub>2</sub>O 10%Lut -16%Melm /THF, 0.02M I<sub>2</sub>, 3%TCA

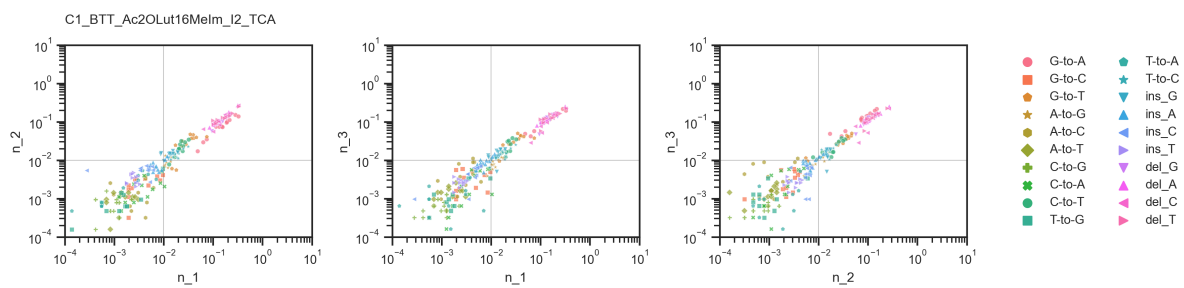

Figure S1. Reproducibility of synthetic errors under different synthetic conditions.

BTT, 5%Pac<sub>2</sub>O -10%MeIm/10%Py/THF, 0.02M I<sub>2</sub>, 3%TCA

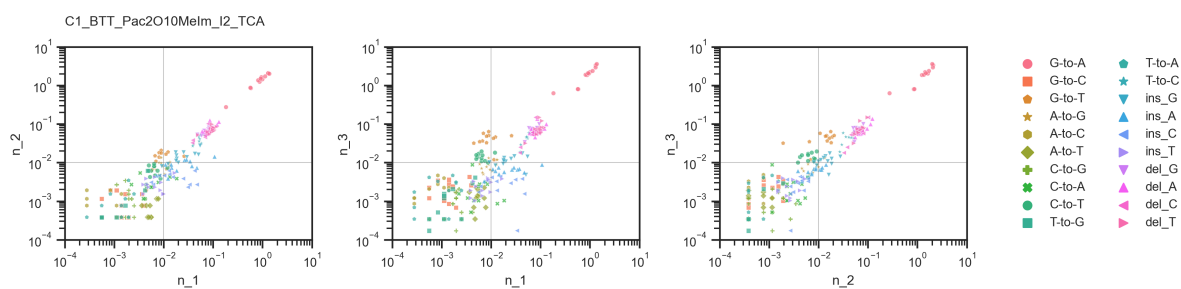

1H-tetrazole, 10%Ac<sub>2</sub>O -10%MeIm/10%Py/THF, CSO, 3%TCA

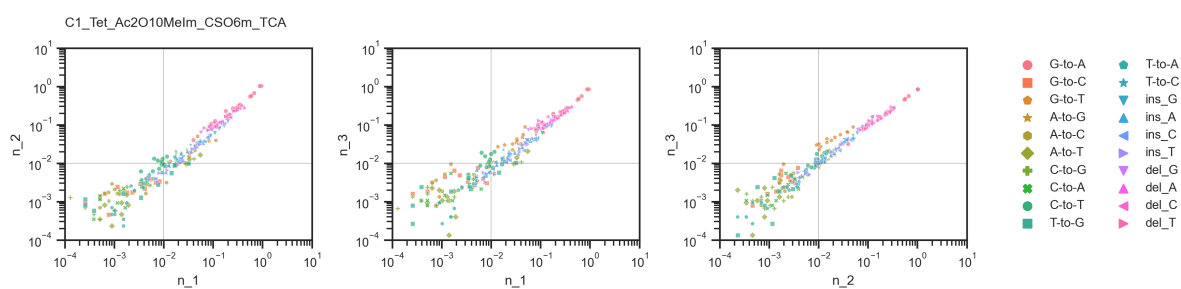

1H-tetrazole, 10%Ac<sub>2</sub>O -10%MeIm/10%Py/THF, 0.02M I<sub>2</sub>, 3%DCA

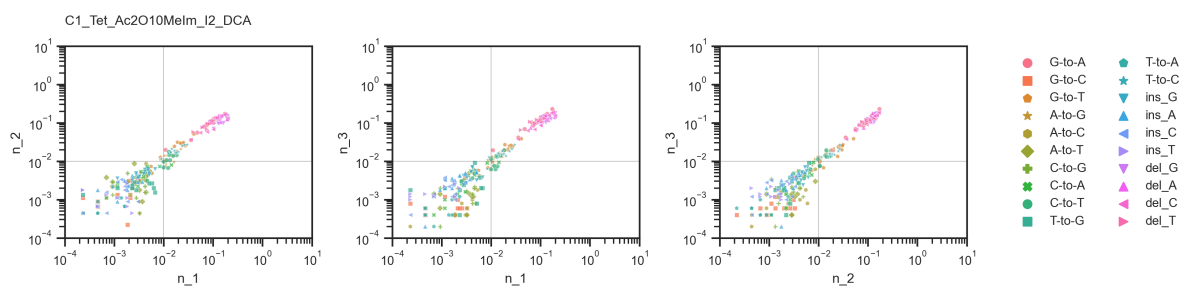

1H-tetrazole, 10%Ac<sub>2</sub>O -10%MeIm/10%Py/THF, 0.02M I<sub>2</sub>, 3%TCAX2

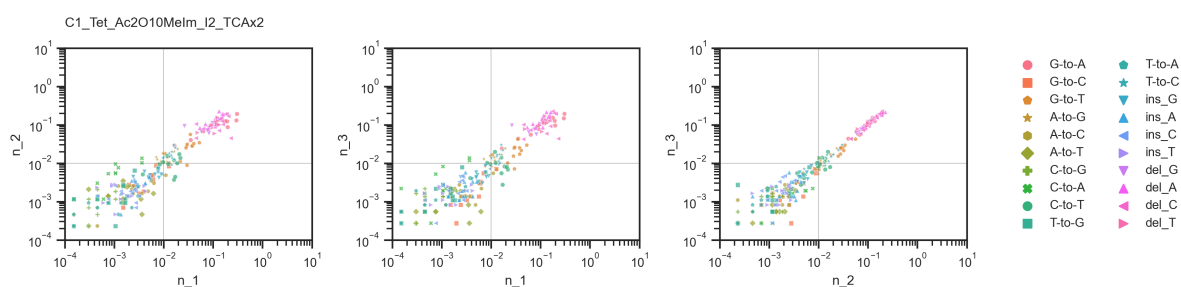

Figure S1. Continued.

1H-tetrazole, 10%Ac<sub>2</sub>O -10%Melm/10%Py/THF, 0.02M I<sub>2</sub>, 3%TCA, Phusion

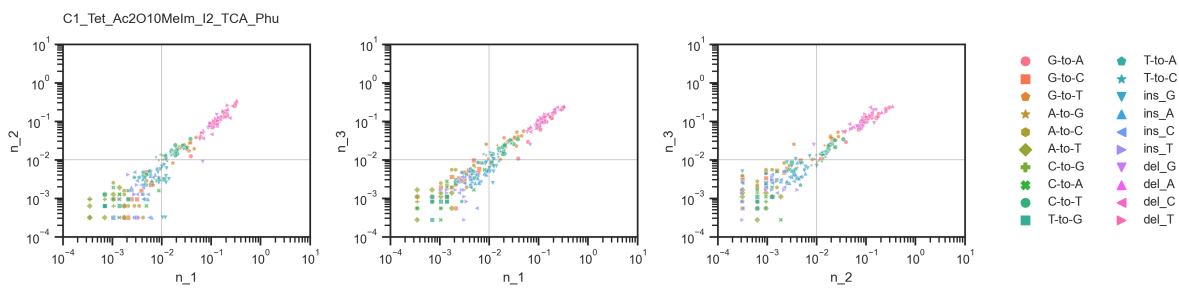

1H-tetrazole, 10%Ac<sub>2</sub>O -10%Melm/10%Py/THF, 0.02M I<sub>2</sub>, 3%TCA, Takara Ex Taq

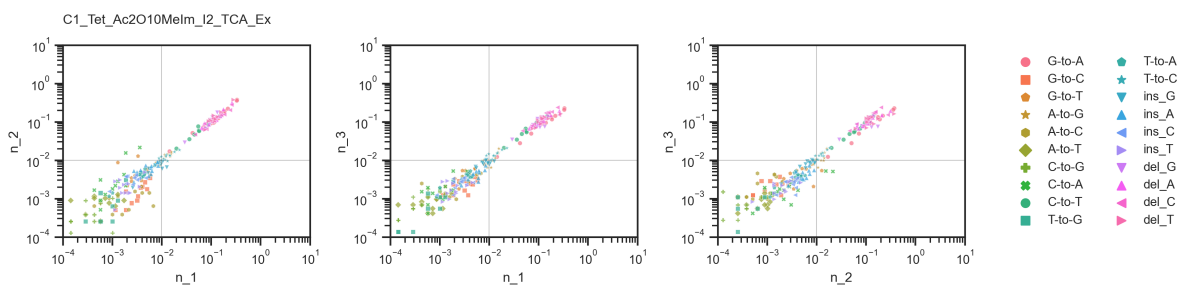

BTT, 5%Pac<sub>2</sub>O -10%Melm/10%Py/THF, 0.02M I<sub>2</sub>, 3%TCA, da<sup>7</sup>dG

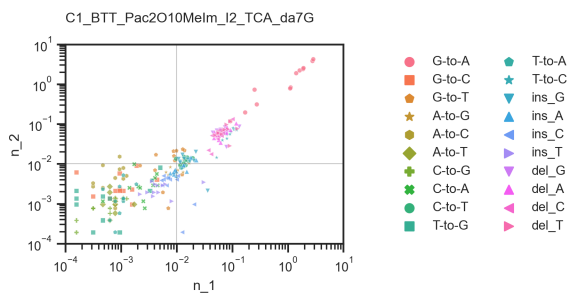

BTT, 5%Pac<sub>2</sub>O -10%Melm/10%Py/THF, 0.02M I<sub>2</sub>, 3%TCA, a<sup>8</sup>da<sup>7</sup>dG

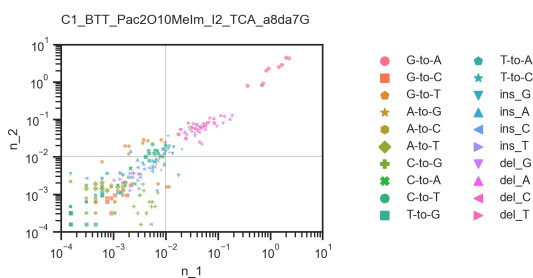

Figure S1. Continued.

1*H*-tetrazole, 10%Ac<sub>2</sub>O -10%MeIm/10%Py/THF, 0.02M I<sub>2</sub>, 3%TCA

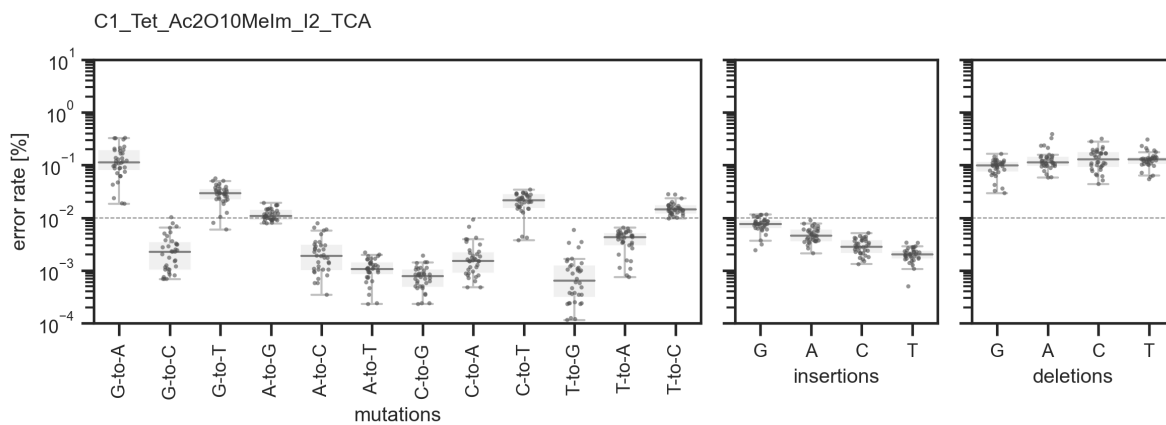

DCI, 10%Ac<sub>2</sub>O -10%MeIm/10%Py/THF, 0.02M I<sub>2</sub>, 3%TCA

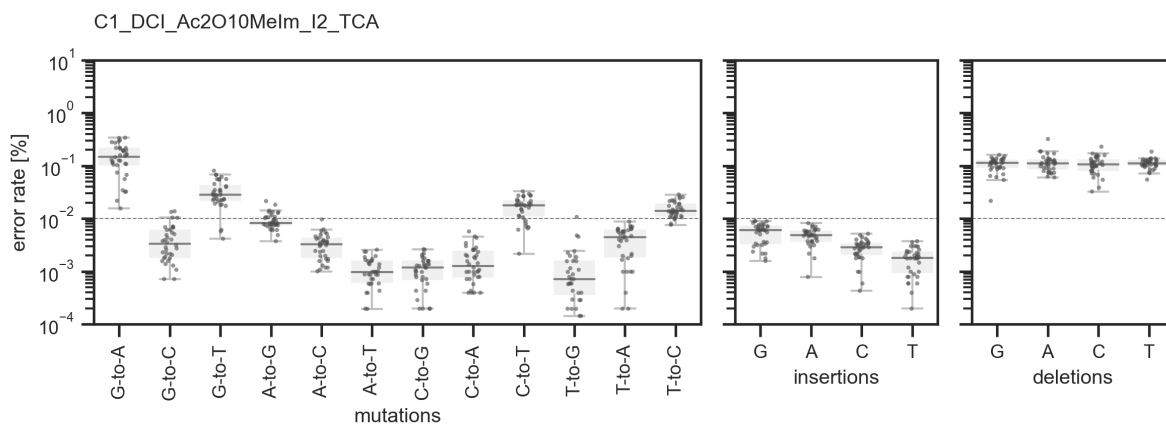

BTT, 10%Ac<sub>2</sub>O -10%MeIm/10%Py/THF, 0.02M I<sub>2</sub>, 3%TCA

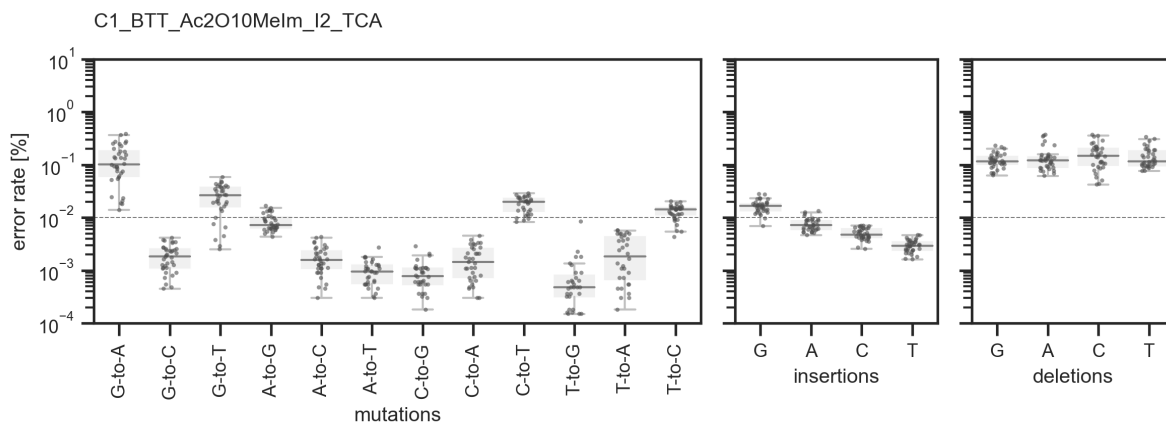

**Figure S2.** Boxplots of synthetic errors under different synthetic conditions



BTT, 10%Ac<sub>2</sub>O 10%Lut -16%MelM /THF, 0.02M I<sub>2</sub>, 3%TCA

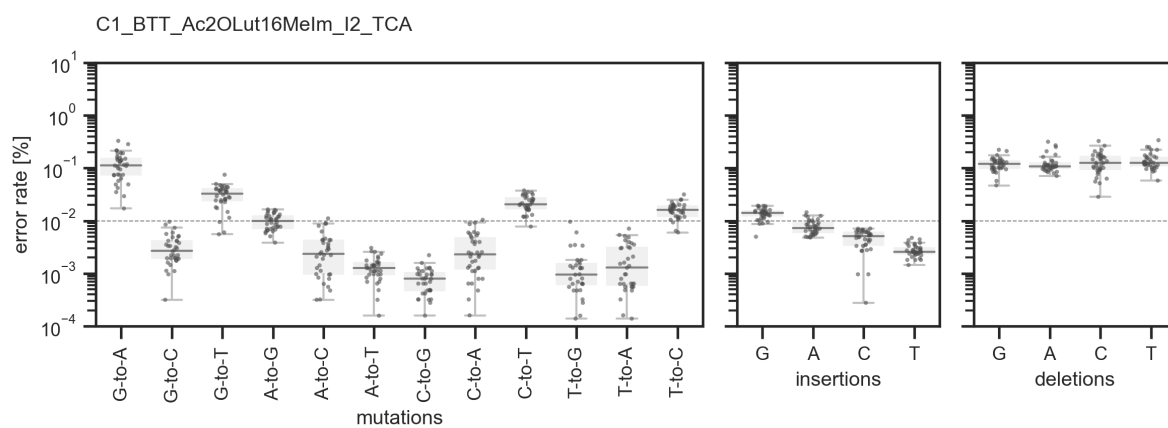

BTT, 5%Pac<sub>2</sub>O -10%MelM/10%Py/THF, 0.02M I<sub>2</sub>, 3%TCA

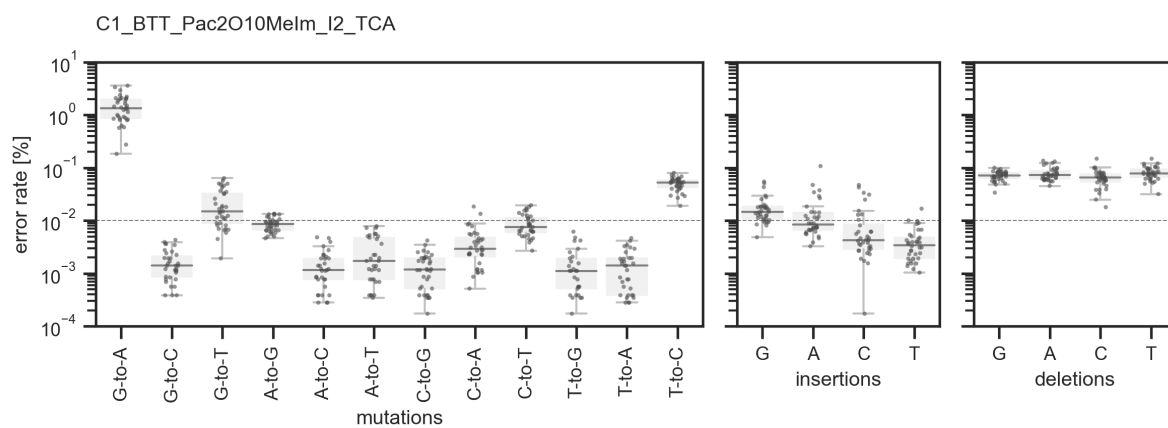

1H-tetrazole, 10%Ac<sub>2</sub>O -10%MelM/10%Py/THF, CSO, 3%TCA

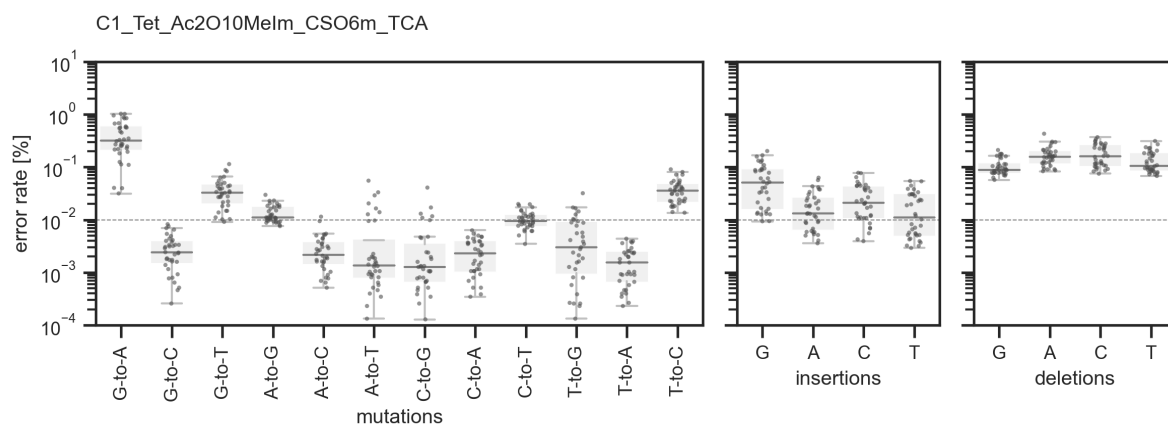

Figure S2. Continued.

1*H*-tetrazole, 10%Ac<sub>2</sub>O -10%MeIm/10%Py/THF, 0.02M I<sub>2</sub>, 3%DCA

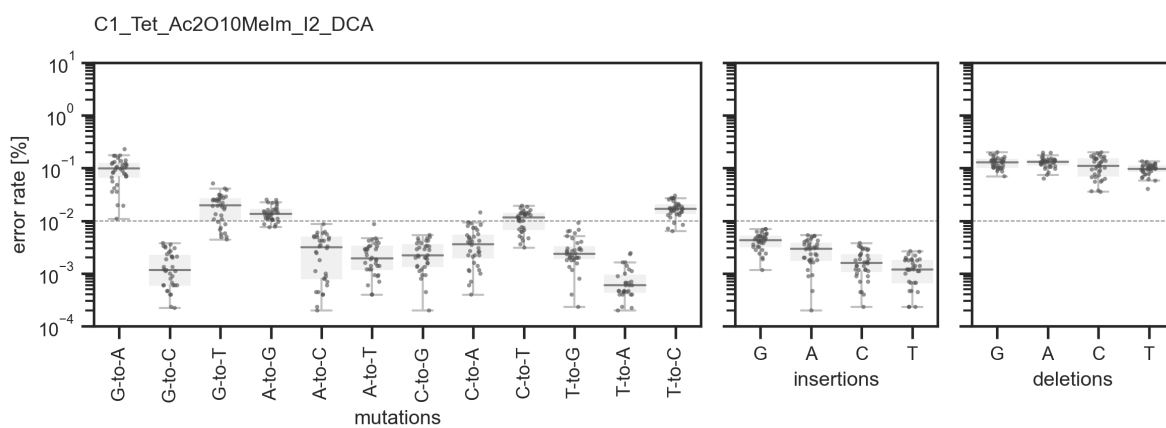

1*H*-tetrazole, 10%Ac<sub>2</sub>O -10%MeIm/10%Py/THF, 0.02M I<sub>2</sub>, 3%TCAx2

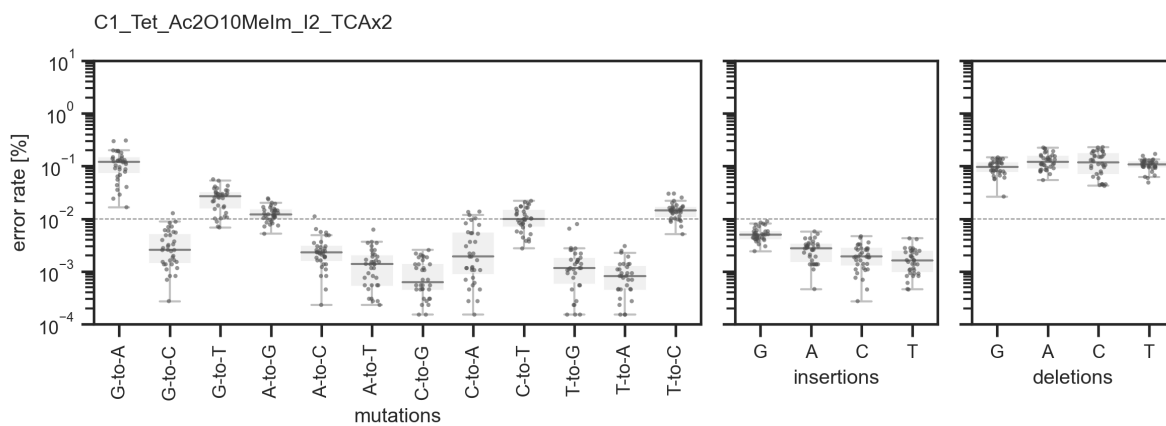

Figure S2. Continued.

**Table S1.** Observed mean error frequencies under each synthetic condition.

The unit of data in the table is nt per kb. Standard deviations were derived from three independent experiment.

| activator           | 1H-Tetrazole          | 1H-Tetrazole          | 1H-Tetrazole          | DCI                   | BTT                   | BTT                   | BTT                   | 1H-Tetrazole      | 1H-Tetrazole          | 1H-Tetrazole          |
|---------------------|-----------------------|-----------------------|-----------------------|-----------------------|-----------------------|-----------------------|-----------------------|-------------------|-----------------------|-----------------------|
| cap A               | Ac <sub>2</sub> O     | Ac <sub>2</sub> O     | Ac <sub>2</sub> O     | Ac <sub>2</sub> O     | Ac <sub>2</sub> O     | Ac <sub>2</sub> O/Lut | Pac <sub>2</sub> O    | Ac <sub>2</sub> O | Ac <sub>2</sub> O     | Ac <sub>2</sub> O     |
| cap B               | 10%MeIm/Py            | 10%MeIm/Py            | 10%MeIm/Py            | 10%MeIm/Py            | 10%MeIm/Py            | 16%MeIm               | 10%MeIm/Py            | 10%MeIm/Py        | 10%MeIm/Py            | 10%MeIm/Py            |
| oxidation           | 0.02 M I <sub>2</sub> | 0.02 M I <sub>2</sub> | 0.02 M I <sub>2</sub> | 0.02 M I <sub>2</sub> | 0.02 M I <sub>2</sub> | 0.02 M I <sub>2</sub> | 0.02 M I <sub>2</sub> | CSO               | 0.02 M I <sub>2</sub> | 0.02 M I <sub>2</sub> |
| deblocking          | 3%TCA                 | 3%TCA                 | 3%TCA                 | 3%TCA                 | 3%TCA                 | 3%TCA                 | 3%TCA                 | 3%TCA             | 3%DCA                 | 3%TCA x 2             |
| polymerase          | Ex                    | Phu                   | Q5                    | Q5                    | Q5                    | Q5                    | Q5                    | Q5                | Q5                    | Q5                    |
| error frequency     | 2.067 ± 0.168         | 1.993 ± 0.299         | 2.064 ± 0.129         | 2.023 ± 0.134         | 2.334 ± 0.305         | 2.299 ± 0.347         | 4.951 ± 1.278         | 3.303 ± 0.386     | 1.793 ± 0.055         | 1.881 ± 0.054         |
| single substitution | 0.641 ± 0.077         | 0.550 ± 0.075         | 0.566 ± 0.039         | 0.620 ± 0.076         | 0.519 ± 0.101         | 0.539 ± 0.126         | 3.908 ± 1.436         | 1.358 ± 0.108     | 0.441 ± 0.020         | 0.494 ± 0.071         |
| single insertion    | 0.044 ± 0.003         | 0.042 ± 0.017         | 0.044 ± 0.004         | 0.038 ± 0.011         | 0.080 ± 0.008         | 0.073 ± 0.003         | 0.116 ± 0.085         | 0.320 ± 0.095     | 0.025 ± 0.004         | 0.030 ± 0.002         |
| single deletion     | 1.236 ± 0.078         | 1.233 ± 0.139         | 1.273 ± 0.073         | 1.138 ± 0.049         | 1.464 ± 0.183         | 1.340 ± 0.194         | 0.756 ± 0.078         | 1.523 ± 0.192     | 1.194 ± 0.045         | 1.166 ± 0.026         |
| multiple insertion  | 0.0003 ± 0.0001       | 0.0004 ± 0.00002      | 0.0005 ± 0.0001       | 0.0007 ± 0.0002       | 0.0008 ± 0.0001       | 0.0011 ± 0.0007       | 0.0006 ± 0.0003       | 0.0015 ± 0.0003   | 0.0005 ± 0.0002       | 0.0006 ± 0.0002       |
| multiple deletion   | 0.145 ± 0.011         | 0.168 ± 0.069         | 0.180 ± 0.014         | 0.226 ± 0.081         | 0.271 ± 0.034         | 0.345 ± 0.038         | 0.171 ± 0.037         | 0.100 ± 0.001     | 0.132 ± 0.001         | 0.190 ± 0.008         |

**Table S2.** Summary of median error rates under each synthetic condition.

The unit of data in the table is %. Sum of error rates including substitutions, insertions, and deletions were divided by 4 to estimate the error rate per nt.

| activator         | 1H-Tetrazole          | 1H-Tetrazole          | 1H-Tetrazole          | DCI                   | BTT                   | BTT                   | BTT                   | 1H-Tetrazole      | 1H-Tetrazole          | 1H-Tetrazole          |
|-------------------|-----------------------|-----------------------|-----------------------|-----------------------|-----------------------|-----------------------|-----------------------|-------------------|-----------------------|-----------------------|
| cap A             | Ac <sub>2</sub> O     | Ac <sub>2</sub> O     | Ac <sub>2</sub> O     | Ac <sub>2</sub> O     | Ac <sub>2</sub> O     | Ac <sub>2</sub> O/Lut | Pac <sub>2</sub> O    | Ac <sub>2</sub> O | Ac <sub>2</sub> O     | Ac <sub>2</sub> O     |
| cap B             | 10%MeIm/Py            | 10%MeIm/Py            | 10%MeIm/Py            | 10%MeIm/Py            | 10%MeIm/Py            | 16%MeIm               | 10%MeIm/Py            | 10%MeIm/Py        | 10%MeIm/Py            | 10%MeIm/Py            |
| oxidation         | 0.02 M I <sub>2</sub> | 0.02 M I <sub>2</sub> | 0.02 M I <sub>2</sub> | 0.02 M I <sub>2</sub> | 0.02 M I <sub>2</sub> | 0.02 M I <sub>2</sub> | 0.02 M I <sub>2</sub> | CSO               | 0.02 M I <sub>2</sub> | 0.02 M I <sub>2</sub> |
| deblocking        | 3%TCA                 | 3%TCA                 | 3%TCA                 | 3%TCA                 | 3%TCA                 | 3%TCA                 | 3%TCA                 | 3%TCA             | 3%DCA                 | 3%TCA x 2             |
| polymerase        | Ex                    | Phu                   | Q5                    | Q5                    | Q5                    | Q5                    | Q5                    | Q5                | Q5                    | Q5                    |
| G-to-A            | 0.116                 | 0.107                 | 0.113                 | 0.149                 | 0.101                 | 0.113                 | 1.333                 | 0.318             | 0.099                 | 0.120                 |
| G-to-C            | 0.002                 | 0.002                 | 0.002                 | 0.003                 | 0.002                 | 0.003                 | 0.001                 | 0.002             | 0.001                 | 0.003                 |
| G-to-T            | 0.004                 | 0.028                 | 0.029                 | 0.028                 | 0.026                 | 0.033                 | 0.015                 | 0.033             | 0.020                 | 0.027                 |
| A-to-G            | 0.011                 | 0.011                 | 0.011                 | 0.008                 | 0.007                 | 0.010                 | 0.009                 | 0.011             | 0.014                 | 0.012                 |
| A-to-C            | 0.001                 | 0.002                 | 0.002                 | 0.003                 | 0.002                 | 0.002                 | 0.001                 | 0.002             | 0.003                 | 0.002                 |
| A-to-T            | 0.001                 | 0.001                 | 0.001                 | 0.001                 | 0.001                 | 0.001                 | 0.001                 | 0.001             | 0.002                 | 0.001                 |
| C-to-G            | 0.000                 | 0.001                 | 0.001                 | 0.001                 | 0.001                 | 0.001                 | 0.001                 | 0.001             | 0.002                 | 0.001                 |
| C-to-A            | 0.002                 | 0.001                 | 0.002                 | 0.001                 | 0.001                 | 0.002                 | 0.003                 | 0.002             | 0.004                 | 0.002                 |
| C-to-T            | 0.076                 | 0.019                 | 0.021                 | 0.018                 | 0.019                 | 0.020                 | 0.007                 | 0.009             | 0.011                 | 0.010                 |
| T-to-G            | 0.000                 | 0.001                 | 0.001                 | 0.001                 | 0.000                 | 0.001                 | 0.001                 | 0.003             | 0.002                 | 0.001                 |
| T-to-A            | 0.004                 | 0.004                 | 0.004                 | 0.004                 | 0.001                 | 0.001                 | 0.001                 | 0.001             | 0.000                 | 0.001                 |
| T-to-C            | 0.013                 | 0.015                 | 0.014                 | 0.014                 | 0.014                 | 0.016                 | 0.052                 | 0.036             | 0.017                 | 0.014                 |
| ins_G             | 0.008                 | 0.007                 | 0.008                 | 0.006                 | 0.016                 | 0.014                 | 0.014                 | 0.050             | 0.004                 | 0.005                 |
| ins_A             | 0.005                 | 0.004                 | 0.005                 | 0.005                 | 0.007                 | 0.007                 | 0.008                 | 0.013             | 0.003                 | 0.003                 |
| ins_C             | 0.003                 | 0.003                 | 0.003                 | 0.003                 | 0.005                 | 0.005                 | 0.004                 | 0.021             | 0.002                 | 0.002                 |
| ins_T             | 0.002                 | 0.002                 | 0.002                 | 0.002                 | 0.003                 | 0.003                 | 0.003                 | 0.011             | 0.001                 | 0.002                 |
| del_G             | 0.106                 | 0.091                 | 0.099                 | 0.113                 | 0.116                 | 0.120                 | 0.071                 | 0.089             | 0.129                 | 0.097                 |
| del_A             | 0.109                 | 0.112                 | 0.113                 | 0.110                 | 0.120                 | 0.108                 | 0.073                 | 0.158             | 0.130                 | 0.121                 |
| del_C             | 0.129                 | 0.125                 | 0.128                 | 0.107                 | 0.146                 | 0.126                 | 0.065                 | 0.159             | 0.109                 | 0.117                 |
| del_T             | 0.118                 | 0.124                 | 0.127                 | 0.111                 | 0.116                 | 0.125                 | 0.078                 | 0.106             | 0.097                 | 0.108                 |
| error rate per nt | 0.177                 | 0.165                 | 0.171                 | 0.172                 | 0.176                 | 0.178                 | 0.436                 | 0.257             | 0.163                 | 0.162                 |
| purity per nt     | 99.82                 | 99.83                 | 99.83                 | 99.83                 | 99.82                 | 99.82                 | 99.56                 | 99.74             | 99.84                 | 99.84                 |

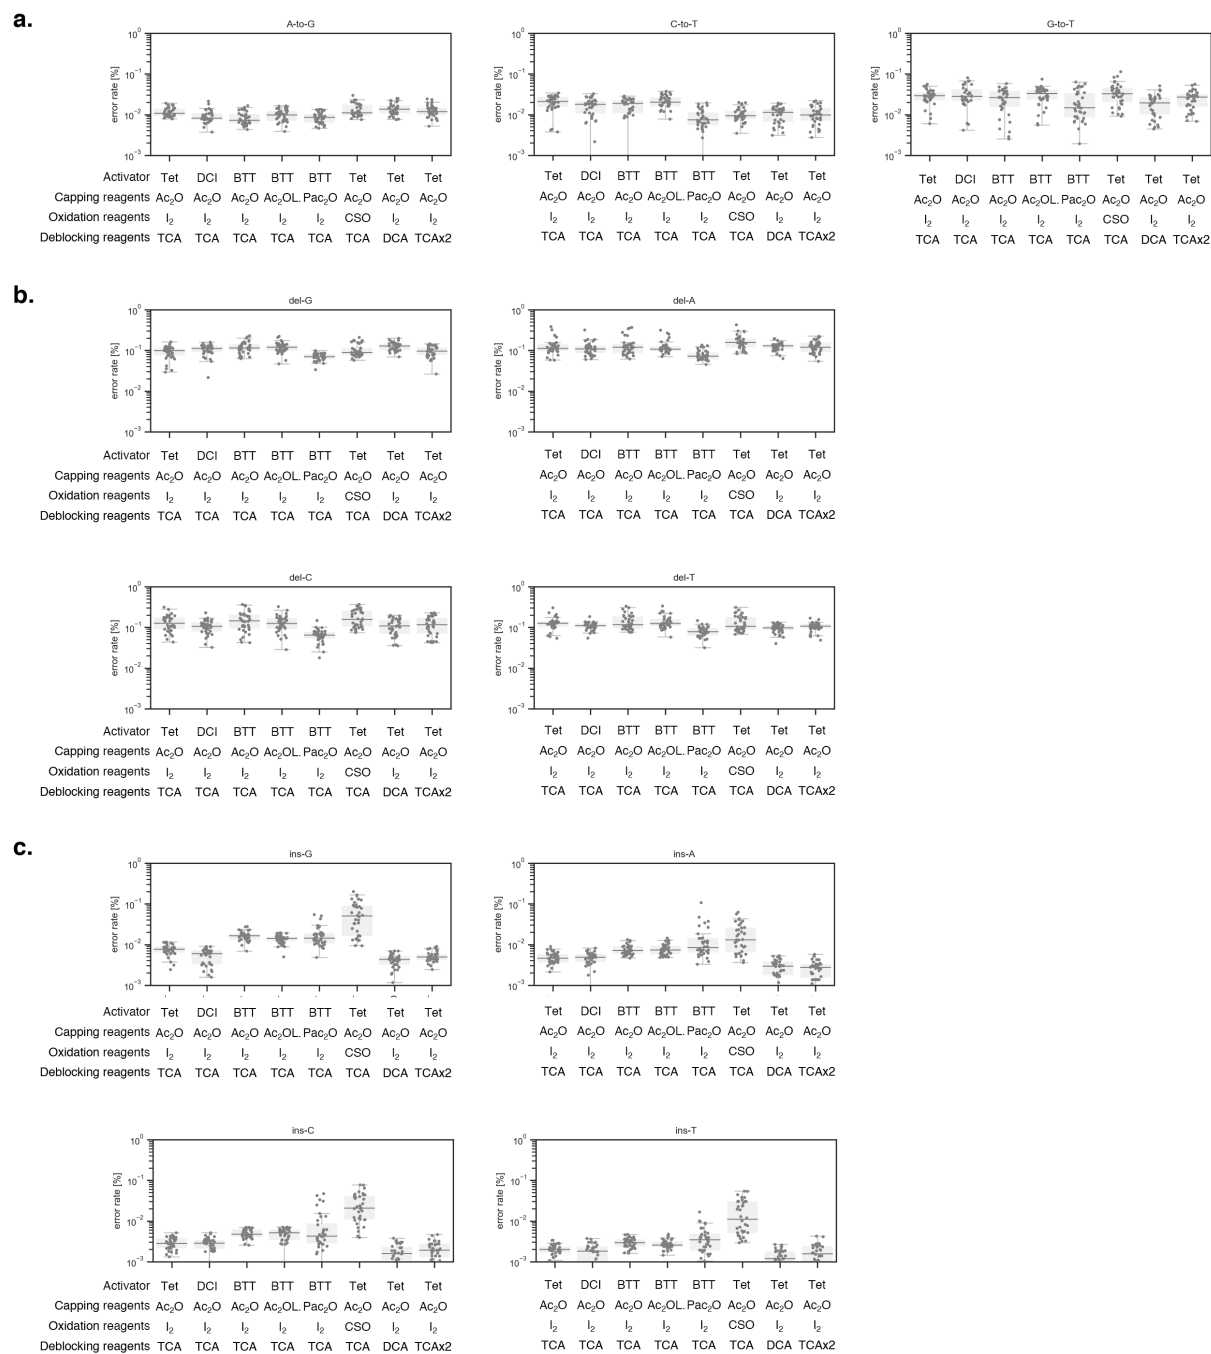

**Figure S3.** Synthetic condition dependency of error rates.

(a) The other substitutions having median error rates more than 0.01%. (b) Deletions. (c) Insertions.

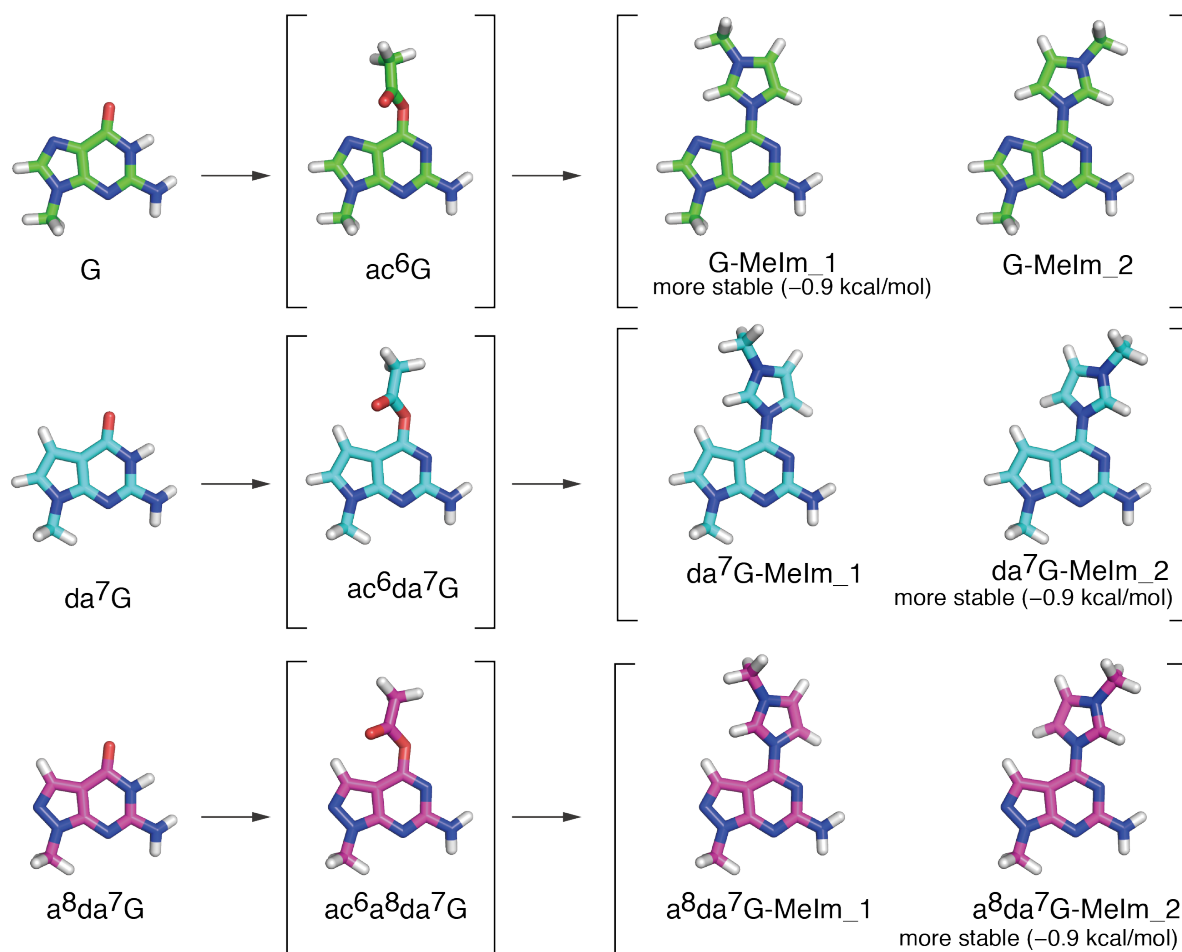

$$\Delta\Delta E_{\text{da}^7\text{G}} = \Delta E(\text{da}^7\text{G-Melm}_2 - \text{da}^7\text{G}) - \Delta E(\text{G-Melm}_1 - \text{G}) = +6.6 \text{ kcal/mol}$$

$$\Delta\Delta E_{\text{a}^8\text{da}^7\text{G}} = \Delta E(\text{a}^8\text{da}^7\text{G-Melm}_2 - \text{a}^8\text{da}^7\text{G}) - \Delta E(\text{G-Melm}_1 - \text{G}) = +13.4 \text{ kcal/mol}$$

**Figure S4.** Optimized structures of guanine base derivatives.

Geometry optimization were carried out with the M06-2X functional and with the 6-31+G(d,p) basis set. The vibrational frequencies were calculated to confirm none of the structures presents imaginary frequencies. Calculations were done with Gaussian 16 RevA.03.

**Table S3.** Calculated energy of intermediates at M06-2X/6-31+G(d,p).

|               | E [au]        | dE [au]       | dE_conf [kcal/mol] | ddE [kcal/mol] |               |
|---------------|---------------|---------------|--------------------|----------------|---------------|
| G             | -581.67239242 | -             |                    |                |               |
| G_ac          | -734.26266357 | -152.59027115 |                    |                |               |
| G_MeIm_1      | -771.09937107 | -189.42697865 | -0.9               |                |               |
| G_MeIm_2      | -771.09800187 | -189.42560945 |                    |                |               |
| da7G          | -565.63145866 | -             |                    |                |               |
| da7G_ac       | -718.21879528 | -152.58733662 |                    | 1.8            | from G_ac     |
| da7G_MeIm_1   | -755.04644286 | -189.41498420 |                    | 7.5            | from G_MeIm_1 |
| da7G_MeIm_2   | -755.04792713 | -189.41646847 | -0.9               | 6.6            | from G_MeIm_1 |
| a8da7G        | -581.65833716 | -             |                    |                |               |
| a8da7G_ac     | -734.24321477 | -152.58487761 |                    | 3.4            | from G_ac     |
| a8da7G_MeIm_1 | -771.06249366 | -189.40415650 |                    | 14.3           | from G_MeIm_1 |
| a8da7G_MeIm_2 | -771.06388291 | -189.40554575 | -0.9               | 13.4           | from G_MeIm_1 |

**Table S4.** Frequencies for optimized structures.

| Frequencies for G |           |           | Frequencies for G-MeIm_1 |           |           | Frequencies for G-MeIm_2 |           |           |
|-------------------|-----------|-----------|--------------------------|-----------|-----------|--------------------------|-----------|-----------|
| 49.9758           | 107.3518  | 144.6734  | 51.3048                  | 62.345    | 73.9702   | 41.1419                  | 60.6907   | 71.6343   |
| 176.4399          | 210.8781  | 249.1699  | 86.9442                  | 110.05    | 130.894   | 88.488                   | 113.3929  | 123.8435  |
| 322.604           | 338.0129  | 365.8631  | 154.9718                 | 185.5455  | 216.6829  | 145.019                  | 161.0676  | 213.3834  |
| 384.0529          | 488.3383  | 523.204   | 224.6286                 | 271.0705  | 278.0629  | 224.6022                 | 267.2009  | 273.8848  |
| 567.9461          | 602.3205  | 626.8031  | 298.6553                 | 307.2878  | 355.0932  | 295.1552                 | 316.4345  | 354.2198  |
| 661.5456          | 684.9338  | 706.9515  | 406.6622                 | 424.626   | 520.4509  | 412.94                   | 420.7731  | 513.8539  |
| 741.1092          | 743.1049  | 772.5257  | 525.0672                 | 564.0757  | 617.7199  | 526.5401                 | 565.0384  | 616.9981  |
| 848.3656          | 871.1324  | 1044.806  | 640.0045                 | 645.4854  | 682.9235  | 639.0144                 | 643.8688  | 675.5531  |
| 1073.4866         | 1092.0922 | 1120.669  | 688.6357                 | 702.2994  | 738.9079  | 689.081                  | 705.7851  | 737.3387  |
| 1152.1716         | 1173.7736 | 1260.8072 | 748.7123                 | 786.5995  | 808.2978  | 749.2946                 | 792.7913  | 808.6239  |
| 1323.0201         | 1345.1758 | 1399.2611 | 866.1672                 | 877.8126  | 908.9966  | 864.8836                 | 877.5624  | 886.4497  |
| 1430.1911         | 1457.854  | 1488.0281 | 911.4263                 | 919.8684  | 1036.2264 | 912.6205                 | 933.1813  | 1045.2564 |
| 1499.7399         | 1520.1757 | 1549.7902 | 1044.0249                | 1067.5162 | 1071.6786 | 1051.0461                | 1054.6911 | 1068.8378 |
| 1603.6632         | 1636.077  | 1641.0902 | 1093.8305                | 1107.9233 | 1118.2899 | 1093.944                 | 1105.8277 | 1140.3672 |
| 1696.0271         | 1858.5978 | 3091.4263 | 1154.2546                | 1155.1609 | 1156.5996 | 1147.9171                | 1153.7371 | 1154.5717 |
| 3169.5579         | 3190.333  | 3277.1237 | 1238.3558                | 1254.0476 | 1287.9177 | 1241.2254                | 1252.6399 | 1284.5604 |
| 3610.7082         | 3631.9676 | 3730.54   | 1339.2432                | 1350.409  | 1388.1746 | 1336.4099                | 1353.3679 | 1375.807  |
|                   |           |           | 1404.2385                | 1427.8602 | 1449.4083 | 1400.6582                | 1426.6224 | 1451.3719 |
|                   |           |           | 1457.5004                | 1464.1049 | 1487.5611 | 1461.4782                | 1464.2384 | 1487.8382 |
|                   |           |           | 1492.3492                | 1493.0408 | 1508.0051 | 1491.1377                | 1493.7539 | 1503.0323 |
|                   |           |           | 1519.3057                | 1522.952  | 1536.0005 | 1518.9553                | 1522.3201 | 1535.1882 |
|                   |           |           | 1596.5092                | 1611.3525 | 1653.5075 | 1597.6306                | 1616.0653 | 1646.9395 |
|                   |           |           | 1658.6017                | 1670.628  | 1747.9184 | 1663.2271                | 1669.637  | 1749.8324 |
|                   |           |           | 3100.6614                | 3109.5805 | 3187.1705 | 3100.8726                | 3108.7648 | 3186.4185 |
|                   |           |           | 3202.6606                | 3202.7488 | 3215.8645 | 3201.1932                | 3203.5408 | 3215.7324 |
|                   |           |           | 3270.9411                | 3281.802  | 3319.626  | 3281.5839                | 3299.0356 | 3326.1279 |
|                   |           |           | 3346.8202                | 3653.5389 | 3796.2449 | 3330.4113                | 3654.5554 | 3797.7799 |

**Table S4.** continued.

| Frequencies for da7G   |           |           | Frequencies for da7G-MeIm_1   |           |           | Frequencies for da7G-MeIm_2   |           |           |
|------------------------|-----------|-----------|-------------------------------|-----------|-----------|-------------------------------|-----------|-----------|
| 34.253                 | 108.9805  | 145.9707  | 41.2369                       | 46.2949   | 60.7219   | 40.4374                       | 47.052    | 65.123    |
| 177.0172               | 225.6399  | 231.2491  | 80.9923                       | 92.2125   | 133.4315  | 80.1747                       | 103.3641  | 130.9676  |
| 312.8236               | 338.2144  | 360.2562  | 160.097                       | 203.4719  | 223.0813  | 160.3787                      | 215.8964  | 232.9064  |
| 386.03                 | 487.3668  | 523.654   | 236.7927                      | 252.0076  | 273.3859  | 246.995                       | 260.7644  | 267.4154  |
| 585.7207               | 592.1861  | 619.486   | 297.7726                      | 309.9122  | 350.4194  | 297.8282                      | 320.1194  | 350.4444  |
| 627.2053               | 675.8237  | 695.3857  | 404.8217                      | 423.2039  | 509.3541  | 410.7539                      | 420.3413  | 501.999   |
| 725.2834               | 738.0749  | 741.6069  | 519.6482                      | 564.6981  | 601.4059  | 520.7826                      | 565.2172  | 601.0345  |
| 787.3654               | 867.5915  | 890.8131  | 624.0344                      | 639.3064  | 677.2388  | 623.1506                      | 639.1221  | 670.8293  |
| 1025.8614              | 1048.2239 | 1084.6464 | 690.6835                      | 701.9272  | 716.8822  | 692.8463                      | 702.2151  | 715.3859  |
| 1111.8365              | 1125.9692 | 1153.2598 | 724.3173                      | 752.3439  | 782.5646  | 726.8942                      | 753.7012  | 776.8116  |
| 1183.4063              | 1264.788  | 1304.386  | 814.4505                      | 857.7343  | 867.6227  | 813.968                       | 857.3132  | 871.1328  |
| 1338.5665              | 1394.6535 | 1456.0529 | 871.1256                      | 904.3051  | 912.6532  | 884.719                       | 901.5824  | 909.4452  |
| 1468.2666              | 1504.6831 | 1510.5624 | 1023.3931                     | 1043.1015 | 1048.7646 | 1025.8161                     | 1047.0303 | 1053.5582 |
| 1521.7271              | 1559.8276 | 1599.0727 | 1068.6817                     | 1102.6791 | 1107.5985 | 1058.6779                     | 1105.1813 | 1105.921  |
| 1621.898               | 1644.5379 | 1704.9032 | 1123.3487                     | 1126.2027 | 1153.3235 | 1122.8147                     | 1132.1237 | 1150.8435 |
| 1832.7582              | 3081.3407 | 3151.3169 | 1153.5716                     | 1155.009  | 1225.0504 | 1153.6528                     | 1155.322  | 1226.3694 |
| 3198.1319              | 3288.8586 | 3311.0892 | 1262.806                      | 1286.6733 | 1320.776  | 1264.3793                     | 1280.2959 | 1320.2071 |
| 3605.697               | 3637.4636 | 3723.4791 | 1352.6256                     | 1388.7109 | 1419.2851 | 1360.4025                     | 1380.351  | 1419.0004 |
|                        |           |           | 1433.1447                     | 1446.2395 | 1456.139  | 1431.5501                     | 1451.5395 | 1458.2985 |
|                        |           |           | 1463.7094                     | 1485.1646 | 1490.6901 | 1463.4431                     | 1480.3875 | 1491.4659 |
|                        |           |           | 1503.5513                     | 1509.5605 | 1518.0023 | 1503.4155                     | 1508.9249 | 1517.6388 |
|                        |           |           | 1523.0212                     | 1552.199  | 1605.9202 | 1522.5281                     | 1551.5428 | 1605.8279 |
|                        |           |           | 1616.1027                     | 1639.6236 | 1647.9096 | 1615.8695                     | 1632.3426 | 1650.8082 |
|                        |           |           | 1667.5334                     | 1737.1061 | 3094.9071 | 1666.8471                     | 1737.6897 | 3094.7836 |
|                        |           |           | 3108.8905                     | 3174.4794 | 3202.1229 | 3109.6584                     | 3174.2394 | 3202.8499 |
|                        |           |           | 3207.7131                     | 3214.7095 | 3286.8377 | 3207.4977                     | 3216.2418 | 3289.2242 |
|                        |           |           | 3304.5053                     | 3318.8023 | 3322.6031 | 3310.9761                     | 3319.4512 | 3326.8969 |
|                        |           |           | 3340.8179                     | 3651.8845 | 3793.3825 | 3344.4409                     | 3650.1436 | 3789.7876 |
| Frequencies for a8da7G |           |           | Frequencies for a8da7G-MeIm_1 |           |           | Frequencies for a8da7G-MeIm_2 |           |           |
| 73.5188                | 111.0199  | 145.3622  | 40.6916                       | 59.4687   | 68.5314   | 38.2043                       | 62.2313   | 74.4392   |
| 173.213                | 225.9911  | 238.1074  | 79.7515                       | 90.9313   | 130.926   | 80.1323                       | 102.4009  | 129.406   |
| 329.1028               | 338.7956  | 362.9981  | 157.1758                      | 222.1551  | 234.712   | 156.5269                      | 216.4173  | 232.2487  |
| 387.8539               | 488.277   | 529.1823  | 236.4183                      | 257.8346  | 274.4756  | 237.4785                      | 259.1624  | 265.981   |
| 548.194                | 591.7227  | 627.8194  | 297.6274                      | 307.7544  | 353.3275  | 297.1995                      | 319.4849  | 353.1454  |
| 658.8923               | 677.7849  | 704.1189  | 406.0111                      | 424.3093  | 528.6537  | 411.7414                      | 421.6779  | 528.4784  |
| 742.3137               | 749.4625  | 777.7412  | 535.4491                      | 560.5393  | 621.7393  | 531.1892                      | 560.7738  | 621.01    |
| 886.0476               | 898.975   | 1020.2702 | 638.8761                      | 651.1132  | 676.7675  | 639.3199                      | 650.609   | 671.8324  |
| 1055.7424              | 1093.9421 | 1124.229  | 692.8413                      | 701.7228  | 736.6684  | 693.8037                      | 700.1354  | 736.3442  |
| 1155.8514              | 1182.2865 | 1244.544  | 743.5914                      | 783.1738  | 806.5338  | 743.4409                      | 773.9636  | 805.688   |
| 1295.0712              | 1331.7404 | 1354.9077 | 848.5003                      | 861.6789  | 865.1027  | 854.8583                      | 862.5971  | 885.1776  |
| 1451.9765              | 1474.8116 | 1492.8494 | 888.6696                      | 914.5822  | 1018.6699 | 889.1364                      | 901.361   | 1019.1229 |
| 1502.4678              | 1522.5809 | 1533.1661 | 1044.3123                     | 1049.3703 | 1063.279  | 1046.5676                     | 1047.5838 | 1062.6816 |
| 1607.2235              | 1628.6466 | 1650.5261 | 1103.7334                     | 1107.228  | 1124.9841 | 1105.3895                     | 1106.0792 | 1130.7496 |
| 1703.634               | 1846.6379 | 3093.2042 | 1153.788                      | 1154.6456 | 1154.8495 | 1151.3208                     | 1154.8872 | 1155.4762 |
| 3172.2083              | 3201.7805 | 3296.5445 | 1220.2846                     | 1272.1926 | 1291.6536 | 1220.3384                     | 1275.556  | 1286.7349 |
| 3615.5288              | 3636.6489 | 3737.4898 | 1310.1247                     | 1327.5684 | 1377.8571 | 1308.2592                     | 1332.2442 | 1379.87   |
|                        |           |           | 1395.2784                     | 1432.9445 | 1451.7533 | 1386.8604                     | 1432.026  | 1454.8128 |
|                        |           |           | 1455.3465                     | 1464.4141 | 1490.3353 | 1460.0537                     | 1464.5235 | 1490.6879 |
|                        |           |           | 1491.3229                     | 1495.4749 | 1503.8941 | 1490.9866                     | 1491.7368 | 1504.4434 |
|                        |           |           | 1522.1792                     | 1525.9206 | 1551.1502 | 1521.6836                     | 1526.0043 | 1553.4709 |
|                        |           |           | 1580.1525                     | 1612.7054 | 1636.607  | 1577.9613                     | 1614.0093 | 1628.9805 |
|                        |           |           | 1651.8392                     | 1676.2453 | 1739.5489 | 1653.3838                     | 1675.145  | 1740.0635 |
|                        |           |           | 3102.3333                     | 3109.3517 | 3188.9866 | 3103.115                      | 3109.8565 | 3189.6773 |
|                        |           |           | 3203.6867                     | 3210.9578 | 3215.4773 | 3204.0604                     | 3211.6762 | 3216.4563 |
|                        |           |           | 3282.4911                     | 3317.6414 | 3321.5165 | 3289.7015                     | 3319.1723 | 3324.1988 |
|                        |           |           | 3342.6348                     | 3649.783  | 3792.4202 | 3344.6057                     | 3650.7605 | 3793.0203 |

**Table S5.** Cartesian coordinations of calculated nucleobases**Cartesian coordinate of G**

|   |          |          |          |
|---|----------|----------|----------|
| N | -1.95736 | 0.23697  | -0.00654 |
| N | -2.50639 | -2.02861 | -0.06510 |
| N | -0.27267 | -1.41321 | 0.01022  |
| N | 1.39851  | 1.77738  | 0.01044  |
| N | 1.92452  | -0.40418 | -0.00088 |
| C | 2.71628  | -1.61872 | -0.00814 |
| C | -1.52941 | -1.06319 | -0.00211 |
| C | 0.56297  | -0.33877 | 0.00185  |
| C | 0.25467  | 1.01601  | 0.01011  |
| C | -1.13271 | 1.40491  | 0.00192  |
| C | 2.36695  | 0.90244  | 0.00426  |
| O | -1.65519 | 2.49944  | -0.00731 |
| H | 2.50134  | -2.21284 | 0.88219  |
| H | 3.77130  | -1.34366 | -0.01640 |
| H | -2.94650 | 0.44111  | -0.08733 |
| H | -3.38460 | -1.83458 | 0.39421  |
| H | -2.15010 | -2.96067 | 0.09485  |
| H | 3.42439  | 1.13143  | 0.00271  |
| H | 2.48699  | -2.21096 | -0.89604 |

**Cartesian coordinate of G-Melm\_1**

|   |          |          |          |
|---|----------|----------|----------|
| N | -0.31703 | 1.77815  | 0.00003  |
| N | -2.11864 | 3.20865  | -0.00024 |
| N | -2.58143 | 0.95487  | 0.00008  |
| N | -0.47516 | -1.93562 | -0.00003 |
| N | -2.68047 | -1.46188 | 0.00002  |
| C | -4.12383 | -1.66040 | 0.00000  |
| C | -1.66865 | 1.93878  | 0.00004  |
| C | -2.04276 | -0.25273 | 0.00003  |
| C | -0.66982 | -0.56816 | -0.00002 |
| C | 0.14968  | 0.55041  | -0.00001 |
| C | -1.69187 | -2.41783 | 0.00002  |
| N | 1.57377  | 0.42194  | -0.00001 |
| H | -4.55754 | -1.20348 | 0.89052  |
| H | -4.32645 | -2.73094 | 0.00034  |
| H | -1.46839 | 3.97637  | 0.00087  |
| H | -3.11092 | 3.38103  | 0.00076  |
| H | -1.93885 | -3.47176 | 0.00002  |
| H | -4.55747 | -1.20404 | -0.89084 |
| C | 2.47547  | 1.46929  | -0.00011 |
| C | 2.24504  | -0.74014 | 0.00005  |
| C | 3.71336  | 0.91055  | -0.00013 |
| N | 3.54414  | -0.46282 | -0.00001 |
| C | 4.62655  | -1.45083 | 0.00006  |
| H | 2.13700  | 2.49245  | -0.00018 |
| H | 1.77685  | -1.71775 | 0.00011  |
| H | 4.69297  | 1.36219  | -0.00021 |
| H | 5.23439  | -1.31644 | 0.89486  |
| H | 5.23449  | -1.31645 | -0.89468 |
| H | 4.18859  | -2.44769 | 0.00004  |



**Table S5.** continued.**Cartesian coordinate of G-Melm\_2**

|   |          |          |          |
|---|----------|----------|----------|
| N | 0.03561  | 1.55953  | -0.00010 |
| N | -1.37463 | 3.37943  | 0.00045  |
| N | -2.35747 | 1.30049  | -0.00006 |
| N | -1.00706 | -2.01237 | 0.00003  |
| N | -3.03322 | -1.01819 | 0.00002  |
| C | -4.48171 | -0.86379 | 0.00002  |
| C | -1.23616 | 2.03844  | -0.00003 |
| C | -2.12360 | -0.00021 | -0.00001 |
| C | -0.86350 | -0.63857 | 0.00001  |
| C | 0.19650  | 0.25221  | -0.00006 |
| C | -2.30232 | -2.18551 | 0.00006  |
| N | 1.55188  | -0.20405 | -0.00008 |
| H | -4.79336 | -0.31626 | 0.89056  |
| H | -4.93533 | -1.85443 | 0.00052  |
| H | -0.56376 | 3.97445  | -0.00181 |
| H | -2.29913 | 3.77896  | -0.00146 |
| H | -2.79648 | -3.14874 | 0.00009  |
| H | -4.79349 | -0.31711 | -0.89100 |
| C | 1.98210  | -1.52034 | -0.00028 |
| C | 2.61710  | 0.60775  | 0.00017  |
| C | 3.34039  | -1.47791 | -0.00015 |
| N | 3.71114  | -0.14518 | 0.00011  |
| C | 5.09045  | 0.34945  | 0.00026  |
| H | 1.27525  | -2.33810 | -0.00045 |
| H | 2.56466  | 1.68583  | 0.00038  |
| H | 4.07123  | -2.27129 | -0.00022 |
| H | 5.59956  | -0.00869 | -0.89460 |
| H | 5.59964  | -0.00954 | 0.89474  |
| H | 5.07204  | 1.43812  | 0.00080  |

**Cartesian coordinate of da<sup>7</sup>G**

|   |          |          |          |
|---|----------|----------|----------|
| N | -1.97942 | 0.24562  | -0.00731 |
| N | -2.51996 | -2.02234 | -0.06737 |
| N | -0.28735 | -1.39448 | 0.01173  |
| C | 1.46161  | 1.76463  | 0.01120  |
| N | 1.92020  | -0.43875 | -0.00063 |
| C | 2.66182  | -1.68418 | -0.00982 |
| C | -1.54210 | -1.05258 | -0.00217 |
| C | 0.56502  | -0.32772 | 0.00285  |
| C | 0.23954  | 1.03038  | 0.01189  |
| C | -1.14786 | 1.39912  | 0.00175  |
| C | 2.46730  | 0.83509  | 0.00412  |
| O | -1.66178 | 2.50398  | -0.00911 |
| H | 3.29364  | -1.75642 | 0.87888  |
| H | 3.28447  | -1.74876 | -0.90552 |
| H | -2.96797 | 0.44719  | -0.09632 |
| H | -3.38208 | -1.83602 | 0.42563  |
| H | -2.15365 | -2.95130 | 0.08975  |
| H | 3.54033  | 0.95987  | 0.00183  |
| H | 1.94349  | -2.50360 | -0.00996 |
| H | 1.56983  | 2.83840  | 0.01480  |

**Table S5.** continued.

**Cartesian coordinate of da<sup>7</sup>G-Melm\_1**

|   |          |          |          |
|---|----------|----------|----------|
| N | 0.24368  | 1.74103  | 0.05178  |
| N | 1.98878  | 3.23542  | 0.19864  |
| N | 2.51976  | 0.99579  | 0.13671  |
| C | 0.64145  | -2.04096 | -0.23774 |
| N | 2.79460  | -1.37179 | -0.03556 |
| C | 4.24783  | -1.42782 | 0.03983  |
| C | 1.58443  | 1.94824  | 0.12963  |
| C | 2.04756  | -0.23784 | 0.02113  |
| C | 0.67417  | -0.61088 | -0.09001 |
| C | -0.16240 | 0.49565  | -0.04216 |
| C | 1.94424  | -2.44973 | -0.19657 |
| N | -1.59469 | 0.35217  | -0.09757 |
| H | 4.64976  | -1.90163 | -0.85747 |
| H | 4.55701  | -1.98609 | 0.92546  |
| H | 1.30706  | 3.96744  | 0.30793  |
| H | 2.96574  | 3.43276  | 0.34353  |
| H | 2.35152  | -3.44767 | -0.28010 |
| H | 4.61714  | -0.40527 | 0.10748  |
| C | -2.46836 | 1.32852  | -0.53027 |
| C | -2.29595 | -0.71596 | 0.29544  |
| C | -3.72091 | 0.81558  | -0.40079 |
| N | -3.58925 | -0.45784 | 0.11773  |
| C | -4.69634 | -1.36587 | 0.43015  |
| H | -2.10424 | 2.28134  | -0.87890 |
| H | -1.88042 | -1.61646 | 0.72189  |
| H | -4.68620 | 1.23853  | -0.63122 |
| H | -5.23988 | -1.59842 | -0.48576 |
| H | -5.35824 | -0.88795 | 1.15233  |
| H | -4.28959 | -2.28118 | 0.85746  |
| H | -0.20424 | -2.69248 | -0.39656 |

**Table S5.** continued.**Cartesian coordinate of da<sup>7</sup>G-Melm\_2**

|   |          |          |          |
|---|----------|----------|----------|
| N | -0.06074 | 1.53451  | -0.11084 |
| N | 1.33438  | 3.36882  | -0.10828 |
| N | 2.32104  | 1.28898  | -0.05440 |
| C | 1.11268  | -2.08765 | 0.13876  |
| N | 3.08215  | -0.97003 | 0.09540  |
| C | 4.51571  | -0.71620 | 0.11815  |
| C | 1.20639  | 2.02181  | -0.09483 |
| C | 2.11634  | -0.01952 | 0.00832  |
| C | 0.84828  | -0.67900 | 0.01885  |
| C | -0.19831 | 0.22607  | -0.06486 |
| C | 2.47180  | -2.20903 | 0.17895  |
| N | -1.56833 | -0.21494 | -0.09510 |
| H | 4.99303  | -1.18233 | -0.74582 |
| H | 4.94982  | -1.10900 | 1.03934  |
| H | 0.52775  | 3.93987  | -0.29790 |
| H | 2.25546  | 3.76233  | -0.21715 |
| H | 3.07687  | -3.10028 | 0.27031  |
| H | 4.66373  | 0.36222  | 0.07754  |
| C | -2.04965 | -1.43403 | -0.52773 |
| C | -2.59912 | 0.55127  | 0.27602  |
| C | -3.40283 | -1.38797 | -0.40119 |
| N | -3.72084 | -0.14229 | 0.10345  |
| C | -5.07526 | 0.33163  | 0.40248  |
| H | -1.39889 | -2.19982 | -0.91648 |
| H | -2.50661 | 1.56168  | 0.64497  |
| H | -4.16024 | -2.12024 | -0.63333 |
| H | -5.51938 | -0.30747 | 1.16569  |
| H | -5.67299 | 0.30577  | -0.50867 |
| H | -5.01382 | 1.35440  | 0.77087  |
| H | 0.41550  | -2.90677 | 0.22145  |

**Cartesian coordinate of a<sup>8</sup>da<sup>7</sup>G**

|   |          |          |          |
|---|----------|----------|----------|
| N | -1.97764 | 0.23998  | -0.00421 |
| N | -2.50787 | -2.02646 | -0.06240 |
| N | -0.28139 | -1.40599 | 0.01014  |
| C | 1.48480  | 1.69042  | 0.00962  |
| N | 1.90990  | -0.40692 | -0.00089 |
| C | 2.73243  | -1.59690 | -0.00856 |
| C | -1.53747 | -1.05934 | -0.00117 |
| C | 0.56464  | -0.33609 | 0.00224  |
| C | 0.23686  | 1.02191  | 0.01040  |
| C | -1.14988 | 1.39769  | 0.00184  |
| N | 2.48071  | 0.82451  | 0.00369  |
| O | -1.66335 | 2.49949  | -0.00833 |
| H | 3.36567  | -1.61116 | 0.88038  |
| H | 3.35834  | -1.60487 | -0.90274 |
| H | -2.96727 | 0.43974  | -0.08586 |
| H | -3.39998 | -1.83357 | 0.36856  |
| H | -2.15429 | -2.96014 | 0.09208  |
| H | 2.06735  | -2.46030 | -0.00921 |
| H | 1.68270  | 2.75232  | 0.01299  |

**Table S5.** continued.

**Cartesian coordinate of a<sup>8</sup>da<sup>7</sup>G-Melm\_1**

|   |          |          |          |
|---|----------|----------|----------|
| N | 0.24936  | 1.74638  | 0.04904  |
| N | 1.99442  | 3.23624  | 0.19468  |
| N | 2.53605  | 1.00261  | 0.12888  |
| C | 0.70981  | -2.02148 | -0.21218 |
| N | 2.75591  | -1.38119 | -0.03526 |
| C | 4.19887  | -1.54188 | 0.01614  |
| C | 1.60275  | 1.95096  | 0.12183  |
| C | 2.05135  | -0.23250 | 0.02386  |
| C | 0.68197  | -0.59692 | -0.07576 |
| C | -0.16262 | 0.51063  | -0.03499 |
| N | 1.94636  | -2.45564 | -0.18216 |
| N | -1.59300 | 0.36368  | -0.08616 |
| H | 4.54671  | -2.00201 | -0.90936 |
| H | 4.46399  | -2.17101 | 0.86646  |
| H | 1.30992  | 3.97236  | 0.24236  |
| H | 2.97565  | 3.44791  | 0.28234  |
| H | 4.63537  | -0.55033 | 0.13088  |
| C | -2.47615 | 1.35148  | -0.47388 |
| C | -2.28535 | -0.72684 | 0.26350  |
| C | -3.72335 | 0.82319  | -0.36087 |
| N | -3.57957 | -0.47079 | 0.10256  |
| C | -4.67994 | -1.39945 | 0.38142  |
| H | -2.12168 | 2.32040  | -0.78624 |
| H | -1.86376 | -1.64353 | 0.64774  |
| H | -4.69308 | 1.24776  | -0.56913 |
| H | -5.23254 | -1.58595 | -0.53948 |
| H | -5.33446 | -0.96136 | 1.13485  |
| H | -4.26449 | -2.33385 | 0.75567  |
| H | -0.09233 | -2.73254 | -0.35172 |

**Table S5.** continued.**Cartesian coordinate of a<sup>8</sup>da<sup>7</sup>G-Melm\_2**

|   |          |          |          |
|---|----------|----------|----------|
| N | -0.06071 | 1.53869  | -0.10147 |
| N | 1.32926  | 3.37266  | -0.11085 |
| N | 2.33181  | 1.30511  | -0.04991 |
| C | 1.18688  | -2.05183 | 0.12211  |
| N | 3.05215  | -0.97804 | 0.08847  |
| C | 4.49626  | -0.82456 | 0.12123  |
| C | 1.21706  | 2.03060  | -0.08714 |
| C | 2.12062  | -0.00762 | 0.00538  |
| C | 0.85794  | -0.66189 | 0.01161  |
| C | -0.20018 | 0.23820  | -0.06143 |
| N | 2.48702  | -2.20685 | 0.16299  |
| N | -1.56554 | -0.21199 | -0.08847 |
| H | 4.93629  | -1.34178 | -0.73209 |
| H | 4.88445  | -1.24370 | 1.05010  |
| H | 0.51129  | 3.94654  | -0.22868 |
| H | 2.24720  | 3.78526  | -0.16238 |
| H | 4.71462  | 0.24149  | 0.06861  |
| C | -2.03122 | -1.45588 | -0.46659 |
| C | -2.60776 | 0.56016  | 0.24112  |
| C | -3.38492 | -1.41762 | -0.35156 |
| N | -3.71918 | -0.15260 | 0.09304  |
| C | -5.08196 | 0.31889  | 0.36111  |
| H | -1.37209 | -2.23478 | -0.81317 |
| H | -2.52869 | 1.58640  | 0.56727  |
| H | -4.13312 | -2.16817 | -0.55382 |
| H | -5.52355 | -0.29147 | 1.14888  |
| H | -5.67152 | 0.24463  | -0.55267 |
| H | -5.03482 | 1.35772  | 0.68373  |
| H | 0.54995  | -2.92180 | 0.19263  |
